# Supplementary material for: An Integrated Experimental and Theoretical Studies on the Corrosion Inhibition of Carbon Steel by Harmal Extracts
Source: MDPI journal article supplement (doi:10.3390/molecules27217250), 2022-10-25
Supplement: s1 [file s1]

## **An Integrated Experimental and Theoretical Studies on the Corrosion Inhibition of Carbon Steel by Harmal Extracts**

Hassan H. Hammud,<sup>\*a</sup> Sarah A. Maache,<sup>\*b</sup> Nasreen Al Otaibi,<sup>\*a</sup> Nadeem S. Sheikh<sup>\*c</sup>

<sup>a</sup> Department of Chemistry, College of Science, King Faisal University, P.O. Box 400, Al-Ahsa 31982, Saudi Arabia

<sup>b</sup> Leading National Academy, Khobar Niagara College, Saudi Arabia

<sup>c</sup> Chemical Sciences, Faculty of Science, Universiti Brunei Darussalam, Jalan Tungku Link, Gadong BE1410, Brunei Darussalam

\* Correspondence: hhammoud@kfu.edu.sa (H.H.H.); sara.maache@lna.edu.sa (S.A.M.); nbalotaibi@kfu.edu.sa (N.A.O); nadeem.sheikh@ubd.edu.bn (N.S.S.)

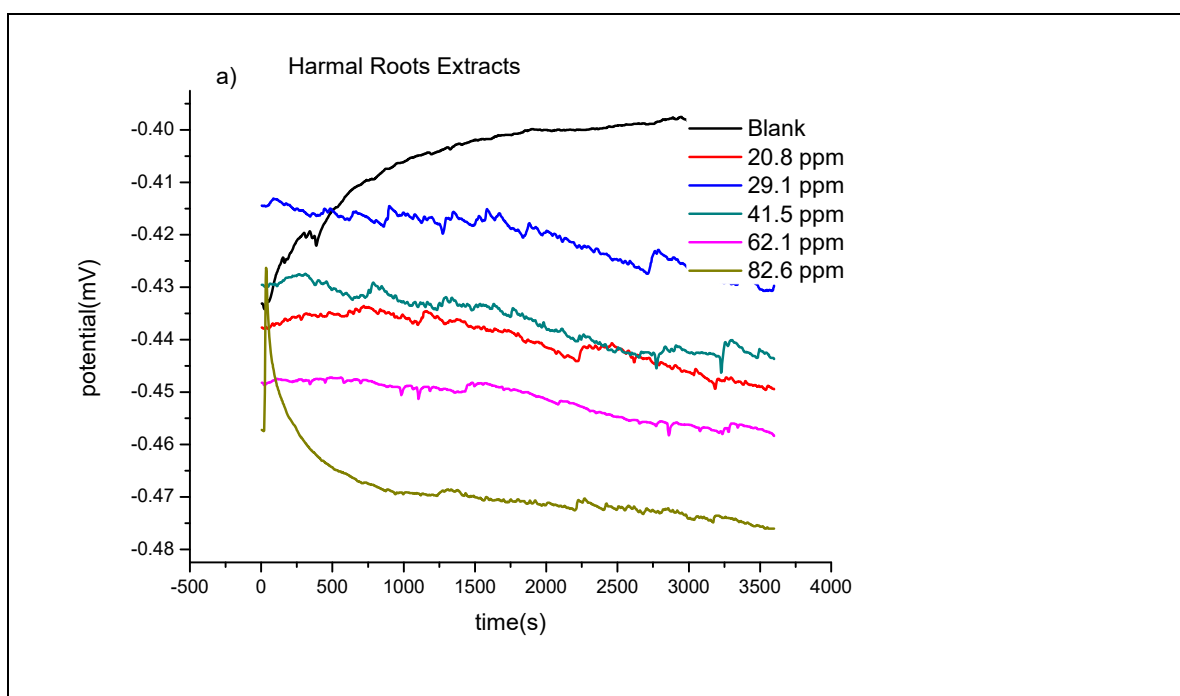

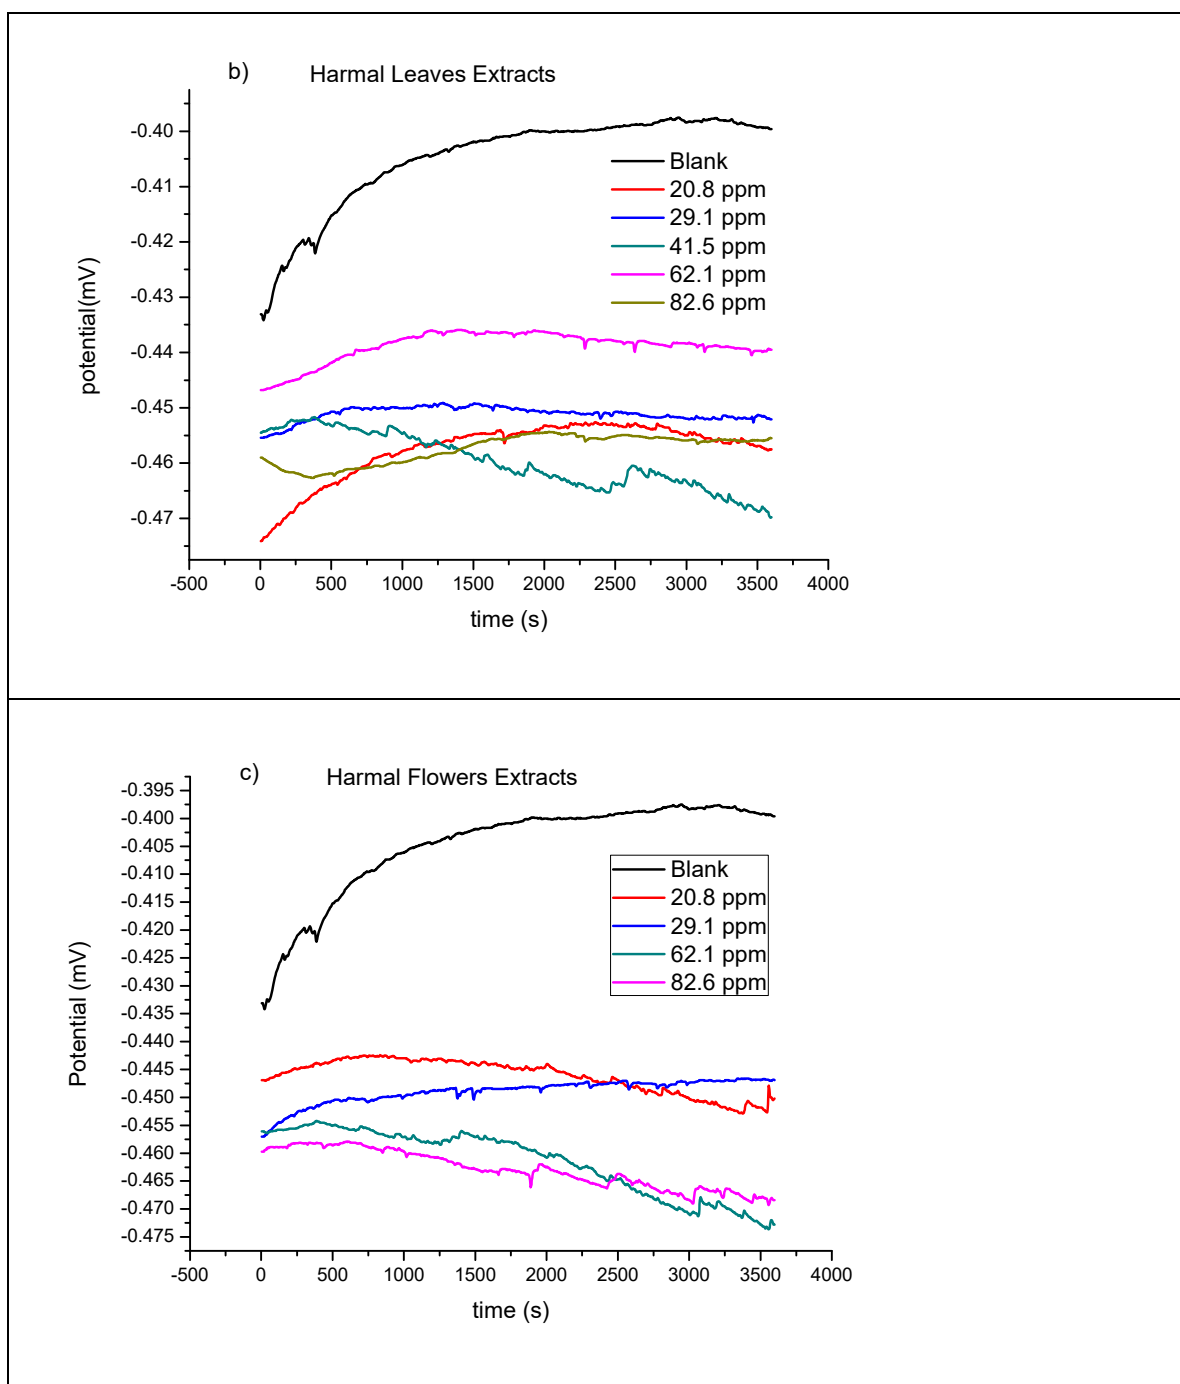

**Figure S1:** The open circuit potential  $E_{OCP}$  plot versus time (s) of C-steel with and without the addition of different concentrations of Harmal extracts a) Roots, b) Leaves and c) Flowers in 0.25M  $H_2SO_4$

**Table S1:** Computed energies for the compounds **1-8** present in the Harmal extract calculated at B3LYP/6-311G++(d,p) [values are in Hartree]

| Compound No. | Species (Phase)  | Total Electronic Energy | Sum of Electronic and Zero-point Energies | Sum of Electronic and Thermal Enthalpies | Gibbs Free Energy |
|--------------|------------------|-------------------------|-------------------------------------------|------------------------------------------|-------------------|
| <b>1</b>     | Neutral (gas)    | -687.5277901            | -687.304343                               | -687.290022                              | -687.344143       |
|              | Neutral (aq.)    | -687.5406854            | -687.317247                               | -687.302999                              | -687.356944       |
|              | Protonated (gas) | -687.9251521            | -687.687517                               | -687.673067                              | -687.727533       |
|              | Protonated (aq.) | -687.9971114            | -687.759501                               | -687.745080                              | -687.799646       |
| <b>2</b>     | Neutral (gas)    | -688.7117287            | -688.465421                               | -688.450556                              | -688.505605       |
|              | Neutral (aq.)    | -688.7243585            | -688.478139                               | -688.463324                              | -688.518279       |
|              | Protonated (gas) | -689.1191448            | -688.858815                               | -688.843665                              | -688.899458       |
|              | Protonated (aq.) | -689.1894665            | -688.928885                               | -688.914004                              | -688.968883       |
| <b>3</b>     | Neutral (gas)    | -689.9216611            | -689.651129                               | -689.635937                              | -689.691722       |
|              | Neutral (aq.)    | -689.9337581            | -689.663108                               | -689.648046                              | -689.703495       |
|              | Protonated (gas) | -690.3010979            | -690.015563                               | -690.000263                              | -690.056132       |
|              | Protonated (aq.) | -690.3886176            | -690.102361                               | -690.087235                              | -690.142728       |
| <b>4</b>     | Neutral (gas)    | -648.2183518            | -648.023209                               | -648.010222                              | -648.061096       |
|              | Neutral (aq.)    | -648.2332676            | -648.038105                               | -648.025178                              | -648.076147       |
|              | Protonated (gas) | -649.8069348            | -649.574731                               | -649.561076                              | -649.613343       |
|              | Protonated (aq.) | -648.6893472            | -648.479642                               | -648.466663                              | -648.518024       |
| <b>5</b>     | Neutral (gas)    | -649.4022675            | -649.184287                               | -649.170751                              | -649.222506       |
|              | Neutral (aq.)    | -649.4169048            | -649.198928                               | -649.185482                              | -649.237061       |
|              | Protonated (gas) | -649.8069348            | -649.574731                               | -649.561076                              | -649.613343       |
|              | Protonated (aq.) | -649.88145              | -649.649333                               | -649.635726                              | -649.687704       |
| <b>6</b>     | Neutral (gas)    | -574.1563024            | -573.942123                               | -573.929962                              | -573.978773       |
|              | Neutral (aq.)    | -574.1665805            | -573.952505                               | -573.940363                              | -573.989180       |
|              | Protonated (gas) | -574.5560344            | -574.327867                               | -574.315460                              | -574.364975       |
|              | Protonated (aq.) | -574.628648             | -574.400306                               | -574.388002                              | -574.437187       |
| <b>7</b>     | Neutral (gas)    | -611.2871074            | -611.072172                               | -611.060255                              | -611.109210       |
|              | Neutral (aq.)    | -611.2959079            | -611.081551                               | -611.069390                              | -611.118909       |
|              | Protonated (gas) | -611.6806331            | -611.452279                               | -611.439805                              | -611.490572       |
|              | Protonated (aq.) | -611.7546719            | -611.526199                               | -611.513717                              | -611.564209       |
| <b>8</b>     | Neutral (gas)    | -685.3563145            | -685.160173                               | -685.147481                              | -685.198362       |
|              | Neutral (aq.)    | -685.3730315            | -685.176695                               | -685.164226                              | -685.214318       |
|              | Protonated (gas) | -685.7303235            | -685.520642                               | -685.507837                              | -685.558974       |
|              | Protonated (aq.) | -685.8106458            | -685.600662                               | -685.587881                              | -685.638723       |

**Table S2:** Cartesian coordinates for the compounds **1-8** present in the Harmal extract computed at B3LYP/6-311G++(d,p)

## Compound No. 1 [Neutral (Gas)]

|   |             |             |             |
|---|-------------|-------------|-------------|
| C | 2.49366600  | -1.57868800 | 0.00007400  |
| C | 2.90185400  | -0.22591800 | 0.00013500  |
| C | 1.97027700  | 0.81036000  | 0.00010300  |
| C | 0.61747100  | 0.45275200  | 0.00002100  |
| C | 0.18672300  | -0.89508300 | -0.00003100 |
| C | 1.15265600  | -1.91139800 | -0.00000800 |
| N | -0.49670900 | 1.27336800  | -0.00004000 |
| C | -1.64426100 | 0.48804600  | -0.00009600 |
| C | -1.25868200 | -0.87129700 | -0.00009100 |
| C | -2.99246700 | 0.86328200  | -0.00015700 |
| N | -3.93964100 | -0.07734200 | -0.00020000 |
| C | -3.58493900 | -1.37641900 | -0.00018900 |
| C | -2.27372300 | -1.83286700 | -0.00014600 |
| C | -3.41512000 | 2.30793200  | -0.00012500 |
| O | 4.25246700  | -0.03543200 | 0.00019500  |
| H | 3.26334600  | -2.34005400 | 0.00009800  |
| H | 2.26920500  | 1.84972700  | 0.00012900  |
| H | 0.85542600  | -2.95405100 | -0.00004500 |
| H | -0.47858800 | 2.27901400  | 0.00006700  |
| H | -4.40793100 | -2.08453500 | -0.00024100 |
| H | -2.05993200 | -2.89520000 | -0.00015500 |
| H | -4.50300600 | 2.36462600  | -0.00052900 |
| H | -3.04060100 | 2.83597800  | 0.88450100  |
| H | -3.03991200 | 2.83623300  | -0.88430400 |
| C | 4.75600700  | 1.29260400  | 0.00039000  |
| H | 4.43971100  | 1.84004800  | -0.89443900 |
| H | 4.43948900  | 1.83986300  | 0.89525200  |
| H | 5.84073000  | 1.19978800  | 0.00051100  |

## Compound No. 1 [Neutral (Aq.)]

|   |             |             |             |
|---|-------------|-------------|-------------|
| C | 2.49036100  | -1.58342600 | 0.00007200  |
| C | 2.89902100  | -0.22800600 | 0.00010300  |
| C | 1.96884400  | 0.80913700  | 0.00008100  |
| C | 0.61572900  | 0.45069400  | 0.00002100  |
| C | 0.18466600  | -0.89936100 | -0.00001800 |
| C | 1.14919500  | -1.91857500 | 0.00000900  |
| N | -0.49533800 | 1.27226600  | -0.00001700 |
| C | -1.64079800 | 0.49062400  | -0.00007000 |
| C | -1.25913300 | -0.87245100 | -0.00008600 |
| C | -2.98962800 | 0.86945400  | -0.00012900 |
| N | -3.93842700 | -0.07467400 | -0.00019600 |
| C | -3.58466800 | -1.37816700 | -0.00020900 |
| C | -2.27454700 | -1.83509100 | -0.00015100 |
| C | -3.40543100 | 2.31504500  | -0.00012500 |
| O | 4.24893800  | -0.03712100 | 0.00016600  |
| H | 3.25707700  | -2.34843600 | 0.00009900  |
| H | 2.26496300  | 1.84872700  | 0.00010500  |
| H | 0.85289000  | -2.96142100 | -0.00001800 |
| H | -0.47017900 | 2.27992000  | 0.00009900  |
| H | -4.40654900 | -2.08756200 | -0.00025300 |
| H | -2.06151700 | -2.89734400 | -0.00015900 |
| H | -4.49277600 | 2.38626900  | -0.00059600 |
| H | -3.02310300 | 2.83991800  | 0.88175000  |
| H | -3.02231000 | 2.84017400  | -0.88150100 |
| C | 4.75344100  | 1.30021900  | 0.00038600  |
| H | 4.43333100  | 1.84245000  | -0.89413400 |
| H | 4.43307100  | 1.84225200  | 0.89493200  |
| H | 5.83764500  | 1.20830700  | 0.00053000  |

## Compound No. 1 [Protonated (Gas)]

|   |             |             |             |
|---|-------------|-------------|-------------|
| C | -2.51593200 | 1.57722400  | -0.00009900 |
| C | -2.93031300 | 0.21358500  | -0.00010400 |
| C | -1.99996600 | -0.82895500 | -0.00013500 |
| C | -0.65495700 | -0.46710900 | -0.00011500 |
| C | -0.22047200 | 0.88458700  | -0.00010000 |
| C | -1.18734000 | 1.91390600  | -0.00009600 |
| N | 0.46167500  | -1.29069200 | -0.00016000 |
| C | 1.59764400  | -0.51330600 | -0.00007500 |
| C | 1.20162000  | 0.86407600  | -0.00004200 |
| C | 2.92465200  | -0.89637200 | 0.00002000  |
| N | 3.83070500  | 0.12078200  | 0.00018400  |
| C | 3.51365100  | 1.44805900  | 0.00021900  |
| C | 2.20298300  | 1.85011800  | 0.00007700  |
| C | 3.41209200  | -2.31150700 | -0.00007400 |
| O | -4.25843200 | 0.03954500  | -0.00013700 |
| H | -3.29042500 | 2.33320900  | -0.00007800 |
| H | -2.30337600 | -1.86629400 | -0.00026200 |
| H | -0.89004300 | 2.95567600  | -0.00006100 |
| H | 0.43529900  | -2.29809200 | -0.00020100 |
| H | 4.34904100  | 2.13346400  | 0.00029200  |
| H | 1.96911100  | 2.90602500  | 0.00007200  |
| H | 4.50205400  | -2.36317700 | 0.00037200  |
| H | 3.05380500  | -2.84560000 | 0.88470200  |
| H | 3.05451700  | -2.84527300 | -0.88533900 |
| H | 4.81179700  | -0.12977600 | 0.00019500  |
| C | -4.80658400 | -1.28380400 | 0.00044000  |
| H | -4.50458200 | -1.82976900 | -0.89758100 |
| H | -4.50347800 | -1.82947500 | 0.89825700  |
| H | -5.88539700 | -1.15091800 | 0.00106700  |

## Compound No. 1 [Protonated (Aq.)]

|   |             |             |             |
|---|-------------|-------------|-------------|
| C | -2.51731200 | 1.58170500  | -0.00005900 |
| C | -2.92911600 | 0.22102000  | -0.00009900 |
| C | -2.00316200 | -0.81968500 | -0.00025700 |
| C | -0.65291900 | -0.46041100 | -0.00019700 |
| C | -0.22012400 | 0.89058700  | -0.00011300 |
| C | -1.18345400 | 1.91815400  | -0.00009500 |
| N | 0.45603700  | -1.28430800 | -0.00023500 |
| C | 1.59284700  | -0.50881800 | -0.00009600 |
| C | 1.20920600  | 0.86589200  | -0.00003900 |
| C | 2.92289900  | -0.89946800 | 0.00001000  |
| N | 3.82675600  | 0.11098700  | 0.00020300  |
| C | 3.51959400  | 1.43777700  | 0.00022200  |
| C | 2.21037100  | 1.84835800  | 0.00006100  |
| C | 3.40066300  | -2.31498500 | -0.00001000 |
| O | -4.27032600 | 0.03900100  | -0.00012200 |
| H | -3.28643200 | 2.34377700  | 0.00009200  |
| H | -2.30038400 | -1.85835900 | -0.00042300 |
| H | -0.88405500 | 2.95937900  | -0.00004800 |
| H | 0.42843800  | -2.29294700 | -0.00011900 |
| H | 4.36017600  | 2.11511100  | 0.00032700  |
| H | 1.98112000  | 2.90477100  | 0.00007800  |
| H | 4.48938100  | -2.36705000 | 0.00026200  |
| H | 3.03233300  | -2.84291600 | 0.88329800  |
| H | 3.03276600  | -2.84275000 | -0.88359800 |
| H | 4.80914800  | -0.14061900 | 0.00031200  |
| C | -4.79165300 | -1.29578600 | 0.00050800  |
| H | -5.87372900 | -1.18773300 | 0.00116700  |
| H | -4.47694500 | -1.83791700 | -0.89492100 |
| H | -4.47579900 | -1.83754800 | 0.89574400  |



## Compound No. 2 [Neutral (Gas)]

|   |             |             |             |
|---|-------------|-------------|-------------|
| C | -2.52357300 | -1.57677700 | -0.11921700 |
| C | -2.95381400 | -0.23176400 | -0.01181800 |
| C | -2.04082400 | 0.81404600  | 0.06655700  |
| C | -0.68058700 | 0.47769800  | 0.03142000  |
| C | -0.22332400 | -0.86557600 | -0.06449800 |
| C | -1.18179500 | -1.89421200 | -0.14462400 |
| N | 0.42559700  | 1.29586600  | 0.07691500  |
| C | 1.57110800  | 0.50384700  | 0.04439900  |
| C | 1.20577100  | -0.81826800 | -0.04440500 |
| C | 2.96136300  | 0.93771500  | -0.02840600 |
| N | 3.92361300  | 0.09584200  | 0.09372900  |
| C | 3.58197600  | -1.29676800 | 0.41486900  |
| C | 2.28300900  | -1.84628000 | -0.20695300 |
| C | 3.27680500  | 2.39135400  | -0.27264800 |
| O | -4.31055500 | -0.06716100 | 0.00597500  |
| H | -3.28441600 | -2.34520000 | -0.17765600 |
| H | -2.35549700 | 1.84602900  | 0.14470900  |
| H | -0.87209700 | -2.93038100 | -0.22301300 |
| H | 0.40685800  | 2.29389500  | 0.20281900  |
| H | 4.43224700  | -1.91978200 | 0.12913600  |
| H | 3.50230400  | -1.35564400 | 1.51053200  |
| H | 2.42929800  | -2.07003600 | -1.27340600 |
| H | 2.02638700  | -2.79310800 | 0.27761600  |
| H | 4.35666200  | 2.52155300  | -0.32892600 |
| H | 2.82300600  | 2.74484800  | -1.20446800 |
| H | 2.89291400  | 3.01823900  | 0.54103400  |
| C | -4.83418400 | 1.24677600  | 0.12045300  |
| H | -4.51787900 | 1.72324700  | 1.05534000  |
| H | -4.53384800 | 1.87293600  | -0.72743500 |
| H | -5.91757300 | 1.13798800  | 0.12064100  |

## Compound No. 2 [Neutral (Aq.)]

|   |             |             |             |
|---|-------------|-------------|-------------|
| C | -2.51892400 | -1.58222200 | -0.12414800 |
| C | -2.95045400 | -0.23531400 | -0.01249900 |
| C | -2.03941200 | 0.81124000  | 0.07089200  |
| C | -0.67780600 | 0.47538600  | 0.03582400  |
| C | -0.21908100 | -0.86969000 | -0.06424600 |
| C | -1.17624000 | -1.90073700 | -0.14879800 |
| N | 0.42382300  | 1.29479900  | 0.08604100  |
| C | 1.56929900  | 0.50590100  | 0.05119800  |
| C | 1.20918100  | -0.81987400 | -0.04303900 |
| C | 2.95692600  | 0.94428000  | -0.02970000 |
| N | 3.92246300  | 0.09935100  | 0.08844900  |
| C | 3.58002400  | -1.29487300 | 0.42082800  |
| C | 2.28755200  | -1.84604900 | -0.20756400 |
| C | 3.26040900  | 2.39760700  | -0.28166800 |
| O | -4.30781700 | -0.07021800 | 0.00435800  |
| H | -3.27636500 | -2.35446400 | -0.18655100 |
| H | -2.35187500 | 1.84297000  | 0.15326200  |
| H | -0.86640900 | -2.93666600 | -0.22966300 |
| H | 0.39845700  | 2.29514400  | 0.20747600  |
| H | 4.43071100  | -1.92191900 | 0.14605300  |
| H | 3.48978500  | -1.34732600 | 1.51589500  |
| H | 2.43797900  | -2.06637900 | -1.27403000 |
| H | 2.03283700  | -2.79470100 | 0.27285300  |
| H | 4.33745000  | 2.54417900  | -0.35497200 |
| H | 2.78703100  | 2.74477200  | -1.20525600 |
| H | 2.87823100  | 3.02146100  | 0.53369600  |
| C | -4.83214100 | 1.25295600  | 0.11959100  |
| H | -4.51490900 | 1.72354200  | 1.05505300  |
| H | -4.52537100 | 1.87499400  | -0.72669800 |
| H | -5.91501500 | 1.14542700  | 0.11656300  |

## Compound No. 2 [Protonated (Gas)]

|   |             |             |             |
|---|-------------|-------------|-------------|
| C | 2.53267700  | -1.58008000 | 0.11290900  |
| C | 2.97293100  | -0.22045200 | 0.01129600  |
| C | 2.06882800  | 0.83630100  | -0.06414900 |
| C | 0.71188300  | 0.50535000  | -0.03403100 |
| C | 0.24842700  | -0.84846200 | 0.05072300  |
| C | 1.20445600  | -1.89540700 | 0.13402100  |
| N | -0.38152200 | 1.32991400  | -0.06900800 |
| C | -1.53383600 | 0.54169200  | -0.05910400 |
| C | -1.15345000 | -0.80844000 | 0.02279900  |
| C | -2.86485400 | 0.96244400  | 0.04414900  |
| N | -3.81067400 | 0.02541300  | -0.02306500 |
| C | -3.52218500 | -1.36846400 | -0.41201400 |
| C | -2.20486500 | -1.86104500 | 0.19762700  |
| C | -3.26543600 | 2.39235700  | 0.22944900  |
| O | 4.30415700  | -0.08076400 | -0.00055500 |
| H | 3.29775500  | -2.34375400 | 0.16895100  |
| H | 2.39436900  | 1.86469900  | -0.13202900 |
| H | 0.88793600  | -2.92886600 | 0.20720500  |
| H | -0.34614400 | 2.32321500  | -0.23499400 |
| H | -4.36192800 | -1.98539000 | -0.09458900 |
| H | -3.46272100 | -1.40414500 | -1.50636100 |
| H | -2.32597800 | -2.07899900 | 1.26643900  |
| H | -1.92596600 | -2.79954600 | -0.28585300 |
| H | -4.31754000 | 2.48323700  | 0.50213500  |
| H | -2.66496500 | 2.86692100  | 1.00815700  |
| H | -3.11182900 | 2.94705800  | -0.70223200 |
| H | -4.77737600 | 0.31110200  | 0.04586200  |
| C | 4.88493500  | 1.22508900  | -0.10243600 |
| H | 4.58859200  | 1.70887600  | -1.03709900 |
| H | 4.60073400  | 1.84335000  | 0.75345000  |
| H | 5.96011100  | 1.06576600  | -0.09752300 |

## Compound No. 2 [Protonated (Aq.)]

|   |             |             |             |
|---|-------------|-------------|-------------|
| C | 2.53599400  | -1.58407100 | 0.11415800  |
| C | 2.97380200  | -0.22892200 | 0.01215800  |
| C | 2.07280100  | 0.82488300  | -0.06364000 |
| C | 0.71078100  | 0.49465300  | -0.03225600 |
| C | 0.24854200  | -0.85567200 | 0.05519500  |
| C | 1.20176000  | -1.89947500 | 0.13596300  |
| N | -0.37837700 | 1.31910700  | -0.07455400 |
| C | -1.52701100 | 0.53324400  | -0.05634600 |
| C | -1.16215700 | -0.81128400 | 0.02924800  |
| C | -2.86826400 | 0.96758500  | 0.03937700  |
| N | -3.80690100 | 0.04253200  | -0.04274300 |
| C | -3.52922800 | -1.35947100 | -0.41219800 |
| C | -2.21798200 | -1.85885400 | 0.20083200  |
| C | -3.24994300 | 2.39642800  | 0.24039600  |
| O | 4.31981700  | -0.07961500 | -0.00233900 |
| H | 3.29502500  | -2.35445400 | 0.17021500  |
| H | 2.39176100  | 1.85456800  | -0.13656000 |
| H | 0.88380200  | -2.93262400 | 0.20857400  |
| H | -0.34352100 | 2.31887400  | -0.20552900 |
| H | -4.37590600 | -1.96015200 | -0.08638700 |
| H | -3.47441400 | -1.40308800 | -1.50547500 |
| H | -2.34383000 | -2.07723900 | 1.26849800  |
| H | -1.94327900 | -2.79703300 | -0.28446200 |
| H | -4.32381400 | 2.50674300  | 0.38541800  |
| H | -2.72807000 | 2.81185000  | 1.10496200  |
| H | -2.95831300 | 2.98031300  | -0.63798200 |
| H | -4.77497700 | 0.32882000  | 0.02658500  |
| C | 4.86980300  | 1.23897100  | -0.10757100 |
| H | 4.55841700  | 1.71810500  | -1.03946300 |
| H | 4.57277700  | 1.85464600  | 0.74552400  |
| H | 5.94937600  | 1.10802600  | -0.10602300 |

## Compound No. 3 [Neutral (Gas)]

|   |             |             |             |
|---|-------------|-------------|-------------|
| C | 2.56179200  | 1.57762100  | 0.15898600  |
| C | 3.02189900  | 0.24753100  | 0.04477000  |
| C | 2.13064300  | -0.81225200 | -0.09878500 |
| C | 0.76620600  | -0.49888300 | -0.12575400 |
| C | 0.27832400  | 0.82711500  | -0.01442800 |
| C | 1.20985200  | 1.86840200  | 0.13097600  |
| N | -0.32815600 | -1.33128100 | -0.25378800 |
| C | -1.48979900 | -0.56608200 | -0.23272000 |
| C | -1.15919300 | 0.75337000  | -0.08091000 |
| C | -2.88694100 | -1.11224800 | -0.35758300 |
| N | -3.85828700 | -0.01161900 | -0.52788000 |
| C | -3.57394900 | 1.18236100  | 0.28130000  |
| C | -2.20181900 | 1.82838900  | -0.00059100 |
| O | 4.38448000  | 0.10302700  | 0.08811300  |
| H | 3.30198200  | 2.36059900  | 0.26911000  |
| H | 2.46694000  | -1.83697000 | -0.18520100 |
| H | 0.87851800  | 2.89732800  | 0.22022200  |
| H | -4.38114900 | 1.89993700  | 0.11174900  |
| H | -3.62529700 | 0.89356100  | 1.33555600  |
| H | -2.24193900 | 2.40442300  | -0.93589700 |
| H | -1.96594500 | 2.54833200  | 0.79218400  |
| H | -0.28893800 | -2.33057900 | -0.36337300 |
| H | -2.95385500 | -1.72171500 | -1.26811300 |
| H | -3.88814300 | 0.25208000  | -1.50740400 |
| C | -3.28519400 | -2.01031900 | 0.82655200  |
| H | -4.28653100 | -2.41411400 | 0.66398900  |
| H | -2.58618700 | -2.84419200 | 0.94316900  |
| H | -3.28490200 | -1.44593100 | 1.76202400  |
| C | 4.92978700  | -1.20059700 | -0.02028500 |
| H | 4.59724600  | -1.84546600 | 0.80173200  |
| H | 4.66702000  | -1.66820900 | -0.97652400 |
| H | 6.01079700  | -1.07944400 | 0.03437800  |

Compound No. **3** [Neutral (Aq.)]

|   |             |             |             |
|---|-------------|-------------|-------------|
| C | 2.56031300  | 1.58270700  | 0.16453700  |
| C | 3.02209000  | 0.25200800  | 0.04421100  |
| C | 2.13206400  | -0.80909900 | -0.09973700 |
| C | 0.76587000  | -0.49787400 | -0.12139500 |
| C | 0.27508000  | 0.83017000  | -0.00567000 |
| C | 1.20572700  | 1.87313000  | 0.14110400  |
| N | -0.32436700 | -1.33169500 | -0.24746700 |
| C | -1.48628500 | -0.56981100 | -0.22589300 |
| C | -1.16255700 | 0.75286900  | -0.07157500 |
| C | -2.88179700 | -1.12107600 | -0.35400000 |
| N | -3.85278300 | -0.02042000 | -0.55196500 |
| C | -3.58376700 | 1.17803600  | 0.26229300  |
| C | -2.20914200 | 1.82559500  | -0.00013500 |
| O | 4.38686900  | 0.10634800  | 0.08150200  |
| H | 3.29594300  | 2.37075900  | 0.27575100  |
| H | 2.46720200  | -1.83324600 | -0.19141500 |
| H | 0.87392400  | 2.90164800  | 0.23499800  |
| H | -4.38517400 | 1.89706800  | 0.07514900  |
| H | -3.65222800 | 0.89204700  | 1.31619100  |
| H | -2.24008000 | 2.40304300  | -0.93426100 |
| H | -1.98678300 | 2.54468600  | 0.79683700  |
| H | -0.28084200 | -2.32984600 | -0.38088900 |
| H | -2.93641000 | -1.74430400 | -1.25410200 |
| H | -3.84180900 | 0.24546100  | -1.53227400 |
| C | -3.28342800 | -2.00016700 | 0.84246800  |
| H | -4.27376200 | -2.42872600 | 0.67285400  |
| H | -2.57279600 | -2.81923600 | 0.98193600  |
| H | -3.30869000 | -1.41775600 | 1.76694300  |
| C | 4.93165100  | -1.20698000 | -0.02898500 |
| H | 4.59714100  | -1.84659200 | 0.79391600  |
| H | 4.66215000  | -1.67017400 | -0.98340300 |
| H | 6.01240300  | -1.08785000 | 0.02242900  |

## Compound No. 3 [Protonated (Gas)]

|   |             |             |             |
|---|-------------|-------------|-------------|
| C | 2.58622700  | 1.57153900  | 0.16765900  |
| C | 3.05565500  | 0.23818100  | 0.04331200  |
| C | 2.16859200  | -0.82612000 | -0.09782500 |
| C | 0.80507500  | -0.51253300 | -0.11287300 |
| C | 0.31539800  | 0.80808100  | 0.00965800  |
| C | 1.24052300  | 1.86061400  | 0.15219800  |
| N | -0.28707100 | -1.35512700 | -0.24205700 |
| C | -1.44370900 | -0.59463700 | -0.20001700 |
| C | -1.11781700 | 0.72961800  | -0.04458900 |
| C | -2.81834400 | -1.16820400 | -0.32207900 |
| N | -3.73665700 | 0.02347500  | -0.63310300 |
| C | -3.52689100 | 1.24504900  | 0.25663000  |
| C | -2.13728400 | 1.82732200  | 0.01791600  |
| O | 4.40255100  | 0.11043300  | 0.07468200  |
| H | 3.32666500  | 2.35386500  | 0.27595300  |
| H | 2.50924100  | -1.84795200 | -0.19219100 |
| H | 0.90837500  | 2.88798300  | 0.24954800  |
| H | -0.23400900 | -2.35472000 | -0.35361400 |
| H | -3.57697800 | 0.30441500  | -1.60453300 |
| H | -4.32692100 | 1.94613000  | 0.01649900  |
| H | -3.65388900 | 0.90009900  | 1.28179100  |
| H | -2.13074600 | 2.43270700  | -0.89764500 |
| H | -1.92712800 | 2.52049700  | 0.83820600  |
| H | -4.70940500 | -0.28476000 | -0.56715300 |
| H | -2.90111700 | -1.80966200 | -1.20715800 |
| C | -3.34358600 | -1.93386400 | 0.89441700  |
| H | -4.36114100 | -2.30329300 | 0.73272700  |
| H | -2.70706900 | -2.80468300 | 1.06046300  |
| H | -3.30981000 | -1.33211100 | 1.80384600  |
| C | 4.98147600  | -1.18687000 | -0.04534300 |
| H | 4.66887800  | -1.83648800 | 0.77858400  |
| H | 4.72141000  | -1.64781000 | -1.00369100 |
| H | 6.05743900  | -1.03517800 | 0.00264600  |

Compound No. **3** [Protonated (Aq.)]

|   |             |             |             |
|---|-------------|-------------|-------------|
| C | 2.59020500  | 1.57964200  | 0.17161000  |
| C | 3.05534300  | 0.24857100  | 0.04424000  |
| C | 2.16903900  | -0.81434400 | -0.09946400 |
| C | 0.80279700  | -0.50372500 | -0.11489200 |
| C | 0.31188700  | 0.82072600  | 0.00881200  |
| C | 1.23806600  | 1.86872900  | 0.15474300  |
| N | -0.28417900 | -1.34243600 | -0.24306600 |
| C | -1.44018700 | -0.58251800 | -0.20450600 |
| C | -1.12424600 | 0.74108400  | -0.04818600 |
| C | -2.81305200 | -1.16619000 | -0.32507700 |
| N | -3.75078800 | 0.00331700  | -0.61373300 |
| C | -3.53911300 | 1.22902300  | 0.25691000  |
| C | -2.15716900 | 1.82636100  | 0.00727500  |
| O | 4.41629200  | 0.10881900  | 0.07558900  |
| H | 3.32540900  | 2.36765200  | 0.28306900  |
| H | 2.50504300  | -1.83725700 | -0.19668900 |
| H | 0.90352000  | 2.89529500  | 0.25418600  |
| H | -0.23896300 | -2.34188400 | -0.36865800 |
| H | -3.64531800 | 0.27330200  | -1.59495200 |
| H | -4.34200800 | 1.92269700  | 0.01485700  |
| H | -3.65673700 | 0.89896200  | 1.28736500  |
| H | -2.16129500 | 2.41516000  | -0.91737200 |
| H | -1.95306300 | 2.53102300  | 0.81837200  |
| H | -4.71616800 | -0.31916300 | -0.51448100 |
| H | -2.88437800 | -1.80412800 | -1.20939500 |
| C | -3.29523200 | -1.95086100 | 0.89612000  |
| H | -4.30523400 | -2.33659100 | 0.73745700  |
| H | -2.63261600 | -2.80444000 | 1.04671200  |
| H | -3.27429800 | -1.34598300 | 1.80370600  |
| C | 4.96889100  | -1.20164800 | -0.04953000 |
| H | 4.69415400  | -1.65721500 | -1.00574500 |
| H | 6.04881400  | -1.07499500 | -0.00524200 |
| H | 4.64419300  | -1.84825200 | 0.77136700  |



## Compound No. 4 [Neutral (Gas)]

|   |             |             |             |
|---|-------------|-------------|-------------|
| C | -3.01468900 | 1.14555500  | 0.00005300  |
| C | -3.26530900 | -0.23964500 | -0.00003200 |
| C | -2.22849200 | -1.16849300 | 0.00000700  |
| C | -0.92232300 | -0.67353300 | 0.00006200  |
| C | -0.64478100 | 0.71657000  | 0.00005600  |
| C | -1.71387800 | 1.62040800  | 0.00007400  |
| N | 0.27589300  | -1.36397600 | 0.00016700  |
| C | 1.32912300  | -0.45474200 | 0.00009000  |
| C | 0.79515300  | 0.85295400  | 0.00007000  |
| C | 2.71037700  | -0.67843400 | 0.00004500  |
| N | 3.54705000  | 0.36189200  | -0.00015400 |
| C | 3.05050200  | 1.61325300  | -0.00015800 |
| C | 1.69649300  | 1.92139200  | 0.00000200  |
| C | 3.29117600  | -2.06706700 | 0.00001800  |
| O | -4.58102000 | -0.61732600 | -0.00016800 |
| H | -3.86103900 | 1.82054900  | 0.00018400  |
| H | -2.43264500 | -2.23471700 | -0.00012000 |
| H | -1.53072500 | 2.68894500  | 0.00021200  |
| H | 0.37081800  | -2.36527700 | -0.00033800 |
| H | 3.78966300  | 2.40844300  | -0.00015500 |
| H | 1.36585300  | 2.95332600  | -0.00000900 |
| H | 4.37855200  | -2.00208300 | 0.00082900  |
| H | 2.97689800  | -2.63408700 | 0.88397900  |
| H | 2.97816900  | -2.63345500 | -0.88478600 |
| H | -4.64809400 | -1.57776400 | -0.00025900 |

## Compound No. 4 [Neutral (Aq.)]

|   |             |             |             |
|---|-------------|-------------|-------------|
| C | -3.01237800 | 1.14718700  | 0.00005000  |
| C | -3.26102400 | -0.24123400 | -0.00004500 |
| C | -2.22533300 | -1.17044000 | 0.00004300  |
| C | -0.91990000 | -0.67169200 | 0.00011900  |
| C | -0.64345300 | 0.72038000  | 0.00012200  |
| C | -1.71254700 | 1.62628500  | 0.00013100  |
| N | 0.27604800  | -1.36240400 | 0.00017100  |
| C | 1.32662400  | -0.45660300 | 0.00014200  |
| C | 0.79514800  | 0.85490000  | 0.00014600  |
| C | 2.70909200  | -0.68304100 | -0.00003400 |
| N | 3.54629300  | 0.36128800  | -0.00029800 |
| C | 3.04925300  | 1.61690300  | -0.00023000 |
| C | 1.69615000  | 1.92493400  | 0.00006000  |
| C | 3.28309900  | -2.07363100 | 0.00001700  |
| O | -4.57674600 | -0.62020600 | -0.00024500 |
| H | -3.85732000 | 1.82477000  | 0.00012400  |
| H | -2.42588600 | -2.23600700 | -0.00008800 |
| H | -1.53062100 | 2.69494000  | 0.00028300  |
| H | 0.36468400  | -2.36616100 | 0.00028400  |
| H | 3.78679600  | 2.41357300  | -0.00028500 |
| H | 1.36543600  | 2.95665100  | 0.00007900  |
| H | 4.37166300  | -2.02375600 | -0.00144200 |
| H | 2.96225700  | -2.63730800 | 0.88252500  |
| H | 2.95981000  | -2.63837900 | -0.88088900 |
| H | -4.64762400 | -1.58255300 | -0.00087100 |

## Compound No. 4 [Protonated (Gas)]

|   |             |             |             |
|---|-------------|-------------|-------------|
| C | -3.0488000  | 1.16346200  | 0.09826600  |
| C | -3.33559200 | -0.22948600 | -0.02032800 |
| C | -2.32932600 | -1.18521300 | -0.10039100 |
| C | -1.01370500 | -0.72142500 | -0.05603100 |
| C | -0.69858600 | 0.67363200  | 0.04653800  |
| C | -1.75752700 | 1.61337100  | 0.13262000  |
| N | 0.16155400  | -1.42454400 | -0.09172300 |
| C | 1.22231600  | -0.51713400 | -0.06589600 |
| C | 0.70160900  | 0.78281000  | 0.02744300  |
| C | 2.59176700  | -0.79530100 | 0.04327500  |
| N | 3.43148500  | 0.23666300  | -0.01168300 |
| C | 2.99877000  | 1.59625300  | -0.38869300 |
| C | 1.63360200  | 1.93997400  | 0.21802300  |
| C | 3.13945100  | -2.17575600 | 0.22528400  |
| O | -4.64539300 | -0.53890500 | -0.04640700 |
| H | -3.88863700 | 1.84383800  | 0.15639100  |
| H | -2.56199600 | -2.24095500 | -0.18338500 |
| H | -1.55011200 | 2.67312800  | 0.21861600  |
| H | 0.23373700  | -2.41367500 | -0.27066100 |
| H | 3.76708100  | 2.29523500  | -0.06078300 |
| H | 2.94105000  | 1.63536500  | -1.48283900 |
| H | 1.72505600  | 2.16006000  | 1.28930300  |
| H | 1.25820400  | 2.84751800  | -0.25930300 |
| H | 4.20554400  | -2.15944500 | 0.45430300  |
| H | 2.61981000  | -2.69531300 | 1.03322700  |
| H | 3.00225900  | -2.75586600 | -0.69319600 |
| H | -4.78681800 | -1.48970900 | -0.13048800 |
| H | 4.42281900  | 0.05510600  | 0.06324900  |

Compound No. 4 [Protonated (Aq.)]

|   |             |             |             |
|---|-------------|-------------|-------------|
| C | -3.03654900 | 1.14869600  | 0.00008200  |
| C | -3.29025300 | -0.24474900 | -0.00008800 |
| C | -2.26006800 | -1.17945100 | -0.00000100 |
| C | -0.95692200 | -0.68178200 | 0.00019000  |
| C | -0.67617300 | 0.71049900  | 0.00018700  |
| C | -1.74339000 | 1.62635200  | 0.00021700  |
| N | 0.23601800  | -1.37752800 | 0.00038500  |
| C | 1.28001800  | -0.48101400 | 0.00025200  |
| C | 0.74865700  | 0.84314800  | 0.00009400  |
| C | 2.64479600  | -0.72380100 | 0.00052800  |
| N | 3.43136200  | 0.37967500  | 0.00005200  |
| C | 2.98247000  | 1.66480100  | -0.00038000 |
| C | 1.63549100  | 1.92976500  | -0.00024400 |
| C | 3.27658700  | -2.07770500 | -0.00020800 |
| O | -4.60056200 | -0.60878700 | -0.00031900 |
| H | -3.88235100 | 1.82460200  | 0.00009400  |
| H | -2.46263800 | -2.24390300 | -0.00008400 |
| H | -1.55660200 | 2.69339600  | 0.00033200  |
| H | 0.32017800  | -2.38268100 | -0.00109900 |
| H | 3.74487100  | 2.42925700  | -0.00057500 |
| H | 1.29077200  | 2.95447800  | -0.00037600 |
| H | 4.36393600  | -2.00709900 | 0.01933100  |
| H | 2.95482700  | -2.65098100 | 0.87312400  |
| H | 2.98530700  | -2.63524200 | -0.89440300 |
| H | -4.68829100 | -1.57041700 | -0.00055300 |
| H | 4.43484900  | 0.23530900  | -0.00008200 |

Compound No. 5 [Neutral (Gas)]

|   |             |             |             |
|---|-------------|-------------|-------------|
| C | -3.04060400 | 1.15561500  | 0.10030300  |
| C | -3.31795600 | -0.22217800 | -0.02563500 |
| C | -2.30107100 | -1.16469700 | -0.10813700 |
| C | -0.98400300 | -0.69523500 | -0.05659500 |
| C | -0.67549400 | 0.69060500  | 0.05877400  |
| C | -1.73611700 | 1.61030100  | 0.14157600  |
| N | 0.20400200  | -1.38837600 | -0.10035300 |
| C | 1.25708600  | -0.47656900 | -0.04980100 |
| C | 0.75143200  | 0.79676600  | 0.05042400  |
| C | 2.68593900  | -0.75960100 | 0.02951200  |
| N | 3.55222500  | 0.18238600  | -0.07731500 |
| C | 3.06453500  | 1.53345900  | -0.38639000 |
| C | 1.71051600  | 1.93281100  | 0.23227900  |
| C | 3.15376000  | -2.17334800 | 0.26168600  |
| O | -4.64440400 | -0.56964800 | -0.06054700 |
| H | -3.87697300 | 1.84073000  | 0.16094300  |
| H | -2.52471900 | -2.22311400 | -0.20190700 |
| H | -1.53692300 | 2.67203100  | 0.23404400  |
| H | 0.29483300  | -2.38009100 | -0.24357200 |
| H | 3.84108700  | 2.24124900  | -0.08871200 |
| H | 2.98497500  | 1.59500100  | -1.48186300 |
| H | 1.82538100  | 2.15851900  | 1.30214500  |
| H | 1.35608000  | 2.85200100  | -0.24369100 |
| H | 4.24111000  | -2.18809100 | 0.32182200  |
| H | 2.73713400  | -2.58243200 | 1.18817000  |
| H | 2.84200200  | -2.82981000 | -0.55944900 |
| H | -4.73047500 | -1.52444700 | -0.14785600 |

Compound No. **5** [Neutral (Aq.)]

|   |             |             |             |
|---|-------------|-------------|-------------|
| C | -3.03702900 | 1.15825000  | 0.10484600  |
| C | -3.31332700 | -0.22199300 | -0.02423000 |
| C | -2.29808800 | -1.16493500 | -0.11229300 |
| C | -0.98061400 | -0.69296800 | -0.06159000 |
| C | -0.67193900 | 0.69491600  | 0.05782800  |
| C | -1.73245200 | 1.61615400  | 0.14462900  |
| N | 0.20373200  | -1.38670400 | -0.11123900 |
| C | 1.25604100  | -0.47754900 | -0.05633900 |
| C | 0.75433300  | 0.79978500  | 0.04843300  |
| C | 2.68266300  | -0.76487600 | 0.03216700  |
| N | 3.55194800  | 0.18048800  | -0.06997300 |
| C | 3.06285700  | 1.53284200  | -0.39128200 |
| C | 1.71421800  | 1.93446900  | 0.23229500  |
| C | 3.13773200  | -2.18027200 | 0.26962400  |
| O | -4.64101500 | -0.57077200 | -0.05652400 |
| H | -3.87129600 | 1.84654100  | 0.16897800  |
| H | -2.51884200 | -2.22234000 | -0.21027800 |
| H | -1.53405800 | 2.67788700  | 0.23843500  |
| H | 0.28849800  | -2.38221700 | -0.24393100 |
| H | 3.83879500  | 2.24535300  | -0.10403500 |
| H | 2.97459600  | 1.58627200  | -1.48642500 |
| H | 1.83234200  | 2.15815900  | 1.30211800  |
| H | 1.36188100  | 2.85526200  | -0.24061400 |
| H | 4.22357800  | -2.21253800 | 0.35177400  |
| H | 2.69632600  | -2.58885900 | 1.18391400  |
| H | 2.83110700  | -2.82963100 | -0.55763500 |
| H | -4.73094000 | -1.52713000 | -0.14615700 |

Compound No. **5** [Protonated (Gas)]

|   |             |             |             |
|---|-------------|-------------|-------------|
| C | -3.0488000  | 1.16346200  | 0.09826600  |
| C | -3.33559200 | -0.22948600 | -0.02032800 |
| C | -2.32932600 | -1.18521300 | -0.10039100 |
| C | -1.01370500 | -0.72142500 | -0.05603100 |
| C | -0.69858600 | 0.67363200  | 0.04653800  |
| C | -1.75752700 | 1.61337100  | 0.13262000  |
| N | 0.16155400  | -1.42454400 | -0.09172300 |
| C | 1.22231600  | -0.51713400 | -0.06589600 |
| C | 0.70160900  | 0.78281000  | 0.02744300  |
| C | 2.59176700  | -0.79530100 | 0.04327500  |
| N | 3.43148500  | 0.23666300  | -0.01168300 |
| C | 2.99877000  | 1.59625300  | -0.38869300 |
| C | 1.63360200  | 1.93997400  | 0.21802300  |
| C | 3.13945100  | -2.17575600 | 0.22528400  |
| O | -4.64539300 | -0.53890500 | -0.04640700 |
| H | -3.88863700 | 1.84383800  | 0.15639100  |
| H | -2.56199600 | -2.24095500 | -0.18338500 |
| H | -1.55011200 | 2.67312800  | 0.21861600  |
| H | 0.23373700  | -2.41367500 | -0.27066100 |
| H | 3.76708100  | 2.29523500  | -0.06078300 |
| H | 2.94105000  | 1.63536500  | -1.48283900 |
| H | 1.72505600  | 2.16006000  | 1.28930300  |
| H | 1.25820400  | 2.84751800  | -0.25930300 |
| H | 4.20554400  | -2.15944500 | 0.45430300  |
| H | 2.61981000  | -2.69531300 | 1.03322700  |
| H | 3.00225900  | -2.75586600 | -0.69319600 |
| H | -4.78681800 | -1.48970900 | -0.13048800 |
| H | 4.42281900  | 0.05510600  | 0.06324900  |

Compound No. **5** [Protonated (Aq.)]

|   |             |             |             |
|---|-------------|-------------|-------------|
| C | -3.05164000 | 1.16561100  | 0.09830400  |
| C | -3.33573100 | -0.22329100 | -0.01973800 |
| C | -2.33143000 | -1.17574000 | -0.10197500 |
| C | -1.01211700 | -0.71013700 | -0.05820000 |
| C | -0.69798900 | 0.68235800  | 0.04757700  |
| C | -1.75485400 | 1.61803800  | 0.13186400  |
| N | 0.15957700  | -1.41233800 | -0.10105400 |
| C | 1.21603500  | -0.50762500 | -0.06543500 |
| C | 0.71119600  | 0.78869000  | 0.03142300  |
| C | 2.59507100  | -0.80099200 | 0.03904800  |
| N | 3.43192600  | 0.21693100  | -0.02561200 |
| C | 3.01176500  | 1.58585000  | -0.38419300 |
| C | 1.65021600  | 1.93944200  | 0.22142600  |
| C | 3.11891900  | -2.18438000 | 0.23451500  |
| O | -4.65671400 | -0.54953900 | -0.04557400 |
| H | -3.88645900 | 1.85286100  | 0.15696400  |
| H | -2.55859000 | -2.23191100 | -0.18892000 |
| H | -1.54727900 | 2.67788900  | 0.21641400  |
| H | 0.23572200  | -2.40735100 | -0.24719100 |
| H | 3.78862200  | 2.26840900  | -0.04594700 |
| H | 2.96115100  | 1.63343200  | -1.47739100 |
| H | 1.74361300  | 2.16014700  | 1.29193200  |
| H | 1.28330500  | 2.84844300  | -0.25860500 |
| H | 4.20271800  | -2.19017900 | 0.34322500  |
| H | 2.66784500  | -2.63873200 | 1.11959000  |
| H | 2.85294400  | -2.80249800 | -0.62806300 |
| H | -4.77061900 | -1.50470400 | -0.13022100 |
| H | 4.42356800  | 0.03142200  | 0.05177600  |

Compound No. 6 [Neutral (Gas)]

|   |             |             |             |
|---|-------------|-------------|-------------|
| C | -3.49623700 | 0.82858300  | 0.07539400  |
| C | -3.66901400 | -0.56438100 | -0.05907400 |
| C | -2.58124400 | -1.42280500 | -0.13571800 |
| C | -1.30463800 | -0.85807200 | -0.07167500 |
| C | -1.10640300 | 0.54890900  | 0.05315400  |
| C | -2.23076700 | 1.38994100  | 0.13114300  |
| N | -0.06217300 | -1.45556700 | -0.10996600 |
| C | 0.91025400  | -0.46656200 | -0.04142700 |
| C | 0.30786400  | 0.76490200  | 0.05921200  |
| C | 2.35960300  | -0.63597300 | 0.03321700  |
| N | 3.14650400  | 0.37179200  | -0.07613400 |
| C | 2.55481200  | 1.68290100  | -0.37776300 |
| C | 1.17527100  | 1.97183300  | 0.24487900  |
| C | 2.93835000  | -2.00872300 | 0.26099300  |
| H | -4.37079800 | 1.46639700  | 0.13314000  |
| H | -2.72111100 | -2.49355600 | -0.23660600 |
| H | -2.10837800 | 2.46291500  | 0.22986300  |
| H | 0.10773000  | -2.43869600 | -0.24030100 |
| H | 3.27515900  | 2.44647700  | -0.07684300 |
| H | 2.47072000  | 1.74305400  | -1.47277400 |
| H | 1.27545900  | 2.20175300  | 1.31520300  |
| H | 0.74797800  | 2.86206000  | -0.22622800 |
| H | 4.02361500  | -1.93745700 | 0.31815200  |
| H | 2.55767800  | -2.45064300 | 1.18776500  |
| H | 2.67667200  | -2.68613200 | -0.56048800 |
| H | -4.67214400 | -0.97306000 | -0.10219800 |

Compound No. 6 [Neutral (Aq.)]

|   |             |             |             |
|---|-------------|-------------|-------------|
| C | -3.49440100 | 0.82960800  | 0.07902800  |
| C | -3.66555000 | -0.56569900 | -0.05862400 |
| C | -2.57747000 | -1.42420800 | -0.13852900 |
| C | -1.29952600 | -0.85771700 | -0.07408800 |
| C | -1.10336200 | 0.55142000  | 0.05404700  |
| C | -2.22904500 | 1.39327600  | 0.13481700  |
| N | -0.06014100 | -1.45456500 | -0.11606300 |
| C | 0.91046100  | -0.46688800 | -0.04579300 |
| C | 0.31016200  | 0.76779800  | 0.05914900  |
| C | 2.35853000  | -0.63952200 | 0.03454000  |
| N | 3.14634000  | 0.37246500  | -0.07226800 |
| C | 2.55144100  | 1.68467200  | -0.38368100 |
| C | 1.17743500  | 1.97442700  | 0.24574300  |
| C | 2.92577900  | -2.01436800 | 0.26668300  |
| H | -4.37011100 | 1.46595500  | 0.13874400  |
| H | -2.71323600 | -2.49468700 | -0.24231500 |
| H | -2.10716300 | 2.46624700  | 0.23487400  |
| H | 0.10695400  | -2.44062100 | -0.24116500 |
| H | 3.27053500  | 2.45302800  | -0.09282700 |
| H | 2.45848800  | 1.73698700  | -1.47820100 |
| H | 1.28250200  | 2.20217600  | 1.31589100  |
| H | 0.75038700  | 2.86602500  | -0.22142900 |
| H | 4.01206900  | -1.96213300 | 0.33062100  |
| H | 2.53240100  | -2.45173000 | 1.18954300  |
| H | 2.65568900  | -2.68848800 | -0.55338000 |
| H | -4.66864400 | -0.97484800 | -0.10178200 |

## Compound No. 6 [Protonated (Gas)]

|   |             |             |             |
|---|-------------|-------------|-------------|
| C | 3.50165900  | 0.85100100  | -0.08431800 |
| C | 3.68268300  | -0.55067700 | 0.04406500  |
| C | 2.61644500  | -1.42604000 | 0.12471500  |
| C | 1.33178800  | -0.87162500 | 0.07122100  |
| C | 1.12467900  | 0.54061200  | -0.04174100 |
| C | 2.24286100  | 1.40363200  | -0.12815700 |
| N | 0.10621200  | -1.48776800 | 0.10621800  |
| C | -0.87874800 | -0.50623900 | 0.06900800  |
| C | -0.27050500 | 0.75114900  | -0.02927500 |
| C | -2.27067000 | -0.68644700 | -0.04336400 |
| N | -3.03004500 | 0.39930400  | 0.01465700  |
| C | -2.50176900 | 1.73109100  | 0.37962600  |
| C | -1.11559100 | 1.97166800  | -0.22690700 |
| C | -2.90940900 | -2.02420900 | -0.23771100 |
| H | 4.37497800  | 1.48839200  | -0.14458900 |
| H | 2.77194300  | -2.49402400 | 0.21779400  |
| H | 2.10909100  | 2.47476900  | -0.22061500 |
| H | -0.03809400 | -2.46947200 | 0.28365300  |
| H | -3.22075500 | 2.47725600  | 0.04411500  |
| H | -2.44574800 | 1.77255500  | 1.47343500  |
| H | -1.18853200 | 2.19621300  | -1.29876100 |
| H | -0.67620100 | 2.85090000  | 0.24883300  |
| H | -3.98261100 | -1.94058100 | -0.41118300 |
| H | -2.45827900 | -2.54520900 | -1.08542300 |
| H | -2.75874100 | -2.64095900 | 0.65424000  |
| H | 4.69138000  | -0.94519500 | 0.07759400  |
| H | -4.03213400 | 0.29109800  | -0.06819400 |



Compound No. 6 [Protonated (Aq.)]

|   |             |             |             |
|---|-------------|-------------|-------------|
| C | 3.50647200  | 0.84905000  | -0.08426700 |
| C | 3.68737500  | -0.55137600 | 0.04387700  |
| C | 2.61667600  | -1.42314400 | 0.12566300  |
| C | 1.33075800  | -0.86663600 | 0.07297400  |
| C | 1.12571000  | 0.54427900  | -0.04211700 |
| C | 2.24380300  | 1.40321000  | -0.12752400 |
| N | 0.10702600  | -1.47931900 | 0.11318400  |
| C | -0.87254600 | -0.49883500 | 0.06681400  |
| C | -0.27635200 | 0.75512000  | -0.03345800 |
| C | -2.27556900 | -0.68864300 | -0.04208200 |
| N | -3.02907400 | 0.38695900  | 0.02575100  |
| C | -2.50928100 | 1.72524000  | 0.37684000  |
| C | -1.12546600 | 1.97259200  | -0.22925500 |
| C | -2.89940400 | -2.02780300 | -0.24396100 |
| H | 4.37913200  | 1.48821500  | -0.14542900 |
| H | 2.76372200  | -2.49206700 | 0.21974100  |
| H | 2.10941400  | 2.47444100  | -0.21988500 |
| H | -0.04390700 | -2.46535000 | 0.26376600  |
| H | -3.23532700 | 2.45887400  | 0.03272500  |
| H | -2.45870600 | 1.77348600  | 1.46961500  |
| H | -1.20141200 | 2.19785800  | -1.30012600 |
| H | -0.69126600 | 2.85223000  | 0.24923600  |
| H | -3.96963200 | -1.94804600 | -0.43009200 |
| H | -2.42655000 | -2.54453300 | -1.08149300 |
| H | -2.74739800 | -2.63754700 | 0.65188300  |
| H | 4.69520300  | -0.94885300 | 0.07684300  |
| H | -4.03198800 | 0.27948600  | -0.06034900 |

Compound No. 7 [Neutral (Gas)]

|   |             |             |             |
|---|-------------|-------------|-------------|
| C | 3.76776100  | 0.43640800  | 0.05568700  |
| C | 3.59988300  | -0.93601800 | -0.13101500 |
| C | 2.32183100  | -1.47913600 | -0.19894700 |
| C | 1.18892900  | -0.66411600 | -0.07569200 |
| C | 1.36120800  | 0.72041000  | 0.11904800  |
| C | 2.64599400  | 1.25529700  | 0.17728000  |
| N | -0.08160600 | -1.26190100 | -0.17521400 |
| C | -1.07985900 | -0.44988300 | -0.22201800 |
| N | -1.04249100 | 0.91373400  | -0.16978900 |
| C | 0.14458600  | 1.60321500  | 0.31569500  |
| C | -2.52661000 | -0.90450000 | -0.28718100 |
| C | -3.29316700 | 0.38813300  | -0.58176000 |
| C | -2.37312100 | 1.50621900  | -0.05781800 |
| H | 4.76154200  | 0.86626300  | 0.10434800  |
| H | 4.46590900  | -1.58129100 | -0.22811100 |
| H | 2.16972800  | -2.54119000 | -0.35240100 |
| H | 2.77328500  | 2.32432500  | 0.32265200  |
| H | 0.26096900  | 2.54947300  | -0.22454100 |
| H | 0.01606500  | 1.85862600  | 1.38267900  |
| H | -3.43441300 | 0.49368500  | -1.65980000 |
| H | -4.27131200 | 0.38375900  | -0.10147700 |
| H | -2.43766600 | 2.42396100  | -0.64917200 |
| H | -2.59156200 | 1.75912300  | 0.98888600  |
| H | -2.66594000 | -1.67366900 | -1.05210700 |
| O | -2.92919800 | -1.40092800 | 0.99368500  |
| H | -2.28894700 | -2.07464200 | 1.25491800  |

|                                   |             |             |             |
|-----------------------------------|-------------|-------------|-------------|
| Compound No. 7 [Neutral (Aq.)]    |             |             |             |
| C                                 | 3.78301500  | 0.42647000  | 0.04326400  |
| C                                 | 3.61348200  | -0.94708300 | -0.14027900 |
| C                                 | 2.33318700  | -1.48939900 | -0.19607600 |
| C                                 | 1.19806900  | -0.67505200 | -0.06348000 |
| C                                 | 1.37409900  | 0.71063600  | 0.12911400  |
| C                                 | 2.66063000  | 1.24510600  | 0.17368800  |
| N                                 | -0.07228500 | -1.27645800 | -0.15044700 |
| C                                 | -1.07808200 | -0.46153000 | -0.17178500 |
| N                                 | -1.03453200 | 0.89176500  | -0.10327300 |
| C                                 | 0.16284100  | 1.59951900  | 0.32974300  |
| C                                 | -2.53004300 | -0.89749800 | -0.27681100 |
| C                                 | -3.25439800 | 0.40406500  | -0.65813700 |
| C                                 | -2.35738600 | 1.51595600  | -0.09062800 |
| H                                 | 4.77693200  | 0.85685000  | 0.08361900  |
| H                                 | 4.47782200  | -1.59368600 | -0.24378700 |
| H                                 | 2.18738600  | -2.55345700 | -0.34646800 |
| H                                 | 2.78753800  | 2.31402900  | 0.31680900  |
| H                                 | 0.26055800  | 2.52661500  | -0.24422500 |
| H                                 | 0.05993700  | 1.88915000  | 1.38801600  |
| H                                 | -3.30427800 | 0.48454500  | -1.74670500 |
| H                                 | -4.27139000 | 0.43664100  | -0.26635900 |
| H                                 | -2.35768100 | 2.41951100  | -0.70439700 |
| H                                 | -2.63598600 | 1.79798400  | 0.93237400  |
| H                                 | -2.65212700 | -1.68822600 | -1.02045500 |
| O                                 | -2.90063200 | -1.38469600 | 1.02300900  |
| H                                 | -3.80842700 | -1.70667600 | 0.97187900  |
| Compound No. 7 [Protonated (Gas)] |             |             |             |
| C                                 | 3.79165800  | 0.41800100  | 0.13358200  |
| C                                 | 3.62143400  | -0.95309900 | -0.04887500 |
| C                                 | 2.34247300  | -1.48344900 | -0.18072800 |
| C                                 | 1.24301400  | -0.63075100 | -0.12513800 |
| C                                 | 1.39286500  | 0.74590500  | 0.05766900  |
| C                                 | 2.68172400  | 1.25888400  | 0.18586400  |
| N                                 | -0.07167200 | -1.15736400 | -0.26342200 |
| C                                 | -1.13694900 | -0.37789800 | -0.22088400 |
| N                                 | -1.06269300 | 0.92360400  | -0.06588700 |
| C                                 | 0.19067900  | 1.66828400  | 0.13017300  |
| C                                 | -2.57230400 | -0.86034200 | -0.28213400 |
| C                                 | -3.35610900 | 0.46561400  | -0.41911100 |
| C                                 | -2.38741200 | 1.56846900  | 0.04252800  |
| H                                 | 4.78636100  | 0.83366200  | 0.23532400  |
| H                                 | 4.48095700  | -1.61039400 | -0.08973500 |
| H                                 | 2.20059900  | -2.54905900 | -0.32520300 |
| H                                 | 2.82120100  | 2.32502500  | 0.32932500  |
| H                                 | 0.24703300  | 2.44889200  | -0.63574200 |
| H                                 | 0.13845000  | 2.16754000  | 1.10444000  |
| H                                 | -3.63381100 | 0.62084200  | -1.46314600 |
| H                                 | -4.26889200 | 0.44194200  | 0.17516300  |
| H                                 | -2.41460200 | 2.45563000  | -0.59218900 |
| H                                 | -2.54528200 | 1.87743900  | 1.07933800  |
| H                                 | -2.72204700 | -1.51284800 | -1.14910200 |
| O                                 | -2.77562800 | -1.57029900 | 0.92854700  |
| H                                 | -3.60597000 | -2.05922600 | 0.88699100  |
| H                                 | -0.20485000 | -2.15844300 | -0.31634900 |

Compound No. 7 [Protonated (Aq.)]

|   |             |             |             |
|---|-------------|-------------|-------------|
| C | 3.79416100  | 0.42038200  | 0.12795000  |
| C | 3.62502100  | -0.95093500 | -0.06020600 |
| C | 2.34608100  | -1.48445000 | -0.18592100 |
| C | 1.24219900  | -0.63600600 | -0.11960500 |
| C | 1.39237900  | 0.74109200  | 0.06710200  |
| C | 2.68094100  | 1.25715800  | 0.18950200  |
| N | -0.06673200 | -1.16465500 | -0.24739400 |
| C | -1.13352600 | -0.38306800 | -0.20522800 |
| N | -1.05983600 | 0.91501000  | -0.04628900 |
| C | 0.19034300  | 1.66179300  | 0.14166800  |
| C | -2.56919200 | -0.85984700 | -0.27664200 |
| C | -3.33844900 | 0.46484200  | -0.46327000 |
| C | -2.38365400 | 1.56603600  | 0.02468300  |
| H | 4.78836100  | 0.83890800  | 0.22581500  |
| H | 4.48540000  | -1.60697400 | -0.11021200 |
| H | 2.20300200  | -2.54848900 | -0.33479000 |
| H | 2.81352200  | 2.32361700  | 0.33492900  |
| H | 0.24376500  | 2.43718300  | -0.62814600 |
| H | 0.14311700  | 2.16483000  | 1.11275200  |
| H | -3.56168100 | 0.60590700  | -1.52165600 |
| H | -4.27685400 | 0.44986700  | 0.08872400  |
| H | -2.38586000 | 2.44908000  | -0.61457600 |
| H | -2.56725900 | 1.87884800  | 1.05532500  |
| H | -2.70802400 | -1.54053400 | -1.11944000 |
| O | -2.82227700 | -1.52897400 | 0.95539300  |
| H | -3.59642000 | -2.09343200 | 0.84442600  |
| H | -0.19470200 | -2.16149400 | -0.36072000 |

Compound No. 8 [Neutral (Gas)]

|   |             |             |             |
|---|-------------|-------------|-------------|
| C | 3.74382800  | 0.23863700  | 0.09976000  |
| C | 3.57136000  | -1.14690000 | -0.05683300 |
| C | 2.30494200  | -1.69245100 | -0.16654300 |
| C | 1.16876100  | -0.86336700 | -0.12126700 |
| C | 1.34792100  | 0.53242700  | 0.03630700  |
| C | 2.63914600  | 1.07044100  | 0.14531100  |
| N | -0.08713700 | -1.44895400 | -0.23445400 |
| C | -1.09001500 | -0.64674200 | -0.18599900 |
| N | -1.02316800 | 0.72164800  | -0.05517200 |
| C | 0.17795200  | 1.42121300  | 0.08212000  |
| C | -2.55119500 | -1.05139200 | -0.24286000 |
| C | -3.24634400 | 0.26441100  | -0.64301200 |
| C | -2.34459100 | 1.36656800  | -0.05982700 |
| H | 4.74135200  | 0.65360800  | 0.18509000  |
| H | 4.43975500  | -1.79555400 | -0.09072000 |
| H | 2.15443300  | -2.75862900 | -0.28505800 |
| H | 2.74096900  | 2.14230700  | 0.26488200  |
| H | -3.27401500 | 0.34539900  | -1.73366700 |
| H | -4.26872300 | 0.31388700  | -0.26758700 |
| H | -2.30627300 | 2.27565600  | -0.65860300 |
| H | -2.62200800 | 1.64010600  | 0.96102900  |
| H | -2.69456400 | -1.85667700 | -0.96678400 |
| O | -2.91531900 | -1.48231500 | 1.07204700  |
| H | -3.69207900 | -2.04640600 | 1.00938400  |
| O | 0.19315500  | 2.63486200  | 0.21376300  |

Compound No. **8** [Neutral (Aq.)]

|   |             |             |             |
|---|-------------|-------------|-------------|
| C | 3.74566500  | 0.23976400  | 0.09842200  |
| C | 3.57304300  | -1.14707200 | -0.05459800 |
| C | 2.30599700  | -1.69189800 | -0.16365100 |
| C | 1.16936100  | -0.86183000 | -0.12189800 |
| C | 1.34738100  | 0.53477700  | 0.03277800  |
| C | 2.64089500  | 1.07148200  | 0.14156700  |
| N | -0.08763700 | -1.44381500 | -0.23411000 |
| C | -1.09392800 | -0.64012900 | -0.19548900 |
| N | -1.02270200 | 0.72649100  | -0.06409900 |
| C | 0.17515000  | 1.41506400  | 0.07906500  |
| C | -2.55284800 | -1.04926900 | -0.25096600 |
| C | -3.26208100 | 0.26709800  | -0.61190700 |
| C | -2.34805500 | 1.37382700  | -0.06096100 |
| H | 4.74291700  | 0.65477600  | 0.18242400  |
| H | 4.44091200  | -1.79579300 | -0.08695800 |
| H | 2.16174000  | -2.75932600 | -0.28082300 |
| H | 2.75222600  | 2.14238500  | 0.25864400  |
| H | -3.33231300 | 0.35036300  | -1.69904500 |
| H | -4.27003900 | 0.31258100  | -0.20027600 |
| H | -2.32128900 | 2.26690600  | -0.68269500 |
| H | -2.60358000 | 1.66803300  | 0.95925400  |
| H | -2.70791000 | -1.83419500 | -0.99395300 |
| O | -2.88408100 | -1.53157100 | 1.05806900  |
| H | -3.78171400 | -1.88366100 | 1.02945400  |
| O | 0.19507400  | 2.63511000  | 0.22283700  |

Compound No. **8** [Protonated (Gas)]

|   |             |             |             |
|---|-------------|-------------|-------------|
| C | 3.76420500  | 0.23988100  | 0.10955500  |
| C | 3.58551400  | -1.14299600 | -0.02841900 |
| C | 2.31414100  | -1.68763800 | -0.14597400 |
| C | 1.21287600  | -0.83247400 | -0.12346700 |
| C | 1.37398000  | 0.55908500  | 0.01511300  |
| C | 2.66714800  | 1.08599700  | 0.13270200  |
| N | -0.09409800 | -1.34217000 | -0.24338800 |
| C | -1.15304400 | -0.55657000 | -0.22278600 |
| N | -1.04355600 | 0.75619000  | -0.09128800 |
| C | 0.20988500  | 1.45443300  | 0.05522000  |
| C | -2.59940000 | -1.00543300 | -0.27204900 |
| C | -3.34550100 | 0.34018100  | -0.44230900 |
| C | -2.35971500 | 1.43888500  | -0.00483300 |
| H | 4.76333400  | 0.64735600  | 0.19944300  |
| H | 4.44711400  | -1.79934700 | -0.04388300 |
| H | 2.17861000  | -2.75816400 | -0.25199700 |
| H | 2.78113000  | 2.15735300  | 0.24143200  |
| H | -3.61775200 | 0.47401400  | -1.49090800 |
| H | -4.26093000 | 0.35239100  | 0.14845700  |
| H | -2.35144500 | 2.31148700  | -0.65524500 |
| H | -2.50239500 | 1.77560300  | 1.02288300  |
| H | -2.76700300 | -1.67394400 | -1.12398300 |
| O | -2.80979300 | -1.68226800 | 0.95530000  |
| H | -3.66605500 | -2.12682600 | 0.94422200  |
| O | 0.20660500  | 2.64808100  | 0.19550900  |
| H | -0.23605600 | -2.34466600 | -0.29067600 |

Compound No. **8** [Protonated (Aq.)]

|   |             |             |             |
|---|-------------|-------------|-------------|
| C | 3.76204900  | 0.24672800  | 0.10084000  |
| C | 3.58739400  | -1.13723700 | -0.04527600 |
| C | 2.31926700  | -1.68653500 | -0.15483000 |
| C | 1.21250600  | -0.83613300 | -0.11626400 |
| C | 1.36927400  | 0.55506600  | 0.02832300  |
| C | 2.66216900  | 1.08651700  | 0.13764000  |
| N | -0.08618900 | -1.35021200 | -0.22458200 |
| C | -1.14417100 | -0.57002800 | -0.20389700 |
| N | -1.03653800 | 0.74900400  | -0.07587800 |
| C | 0.19942000  | 1.43854200  | 0.06985400  |
| C | -2.59197300 | -1.01113300 | -0.25881300 |
| C | -3.31747600 | 0.32649900  | -0.51722300 |
| C | -2.35840800 | 1.42696100  | -0.03709500 |
| H | 4.76001900  | 0.65797300  | 0.18429600  |
| H | 4.45155600  | -1.78933700 | -0.07375500 |
| H | 2.18304400  | -2.75486000 | -0.26884700 |
| H | 2.77657800  | 2.15687900  | 0.24915700  |
| H | -3.50249900 | 0.43336100  | -1.58698500 |
| H | -4.27278900 | 0.35355800  | 0.00382100  |
| H | -2.32854000 | 2.29640800  | -0.68950100 |
| H | -2.54444400 | 1.75620500  | 0.98554800  |
| H | -2.74569900 | -1.72937500 | -1.06692600 |
| O | -2.86284000 | -1.60246400 | 1.00610000  |
| H | -3.63440900 | -2.17511400 | 0.91960800  |
| O | 0.20479700  | 2.64243500  | 0.21119500  |
| H | -0.21968300 | -2.35249200 | -0.31110800 |
